# Supplementary material for: Biphasic Regulation of Mesenchymal Genes Controls Fate Switches During Hematopoietic Differentiation of Human Pluripotent Stem Cells
Source: PubMed Central journal article supplement (PMC7578858; doi:10.1002/advs.202001019), 2020-08-19
Supplement: ADVS-7-2001019-s001.pdf [file ADVS-7-2001019-s001.pdf]

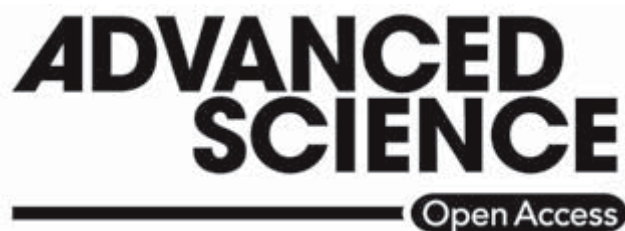

## Supporting Information

for *Adv. Sci.*, DOI: 10.1002/advs.202001019

### **Biphasic Regulation of Mesenchymal Genes Controls Fate Switches During Hematopoietic Differentiation of Human Pluripotent Stem Cells**

*Hongtao Wang, Mengge Wang, Yuqi Wen, Changlu Xu, Xiaoyuan Chen, Dan Wu, Pei Su, Wen Zhou, Tao Cheng, Lihong Shi,\* and Jiaxi Zhou\**

## **Supplemental Information**

### **Biphasic Regulation of Mesenchymal Genes Controls Fate Switches During Hematopoietic Differentiation of Human Pluripotent Stem Cells**

Hongtao Wang<sup>1,2§</sup>, Mengge Wang<sup>1,2§</sup>, Yuqi Wen<sup>1,2§</sup>, Changlu Xu<sup>1,2</sup>, Xiaoyuan Chen<sup>1,2</sup>, Dan  
Wu<sup>1,2</sup>, Pei Su<sup>1,2</sup>, Wen Zhou<sup>3</sup>, Tao Cheng<sup>1,2</sup>, Lihong Shi<sup>1,2\*</sup>, Jiayi Zhou<sup>1,2\*</sup>

#### **The Following Files are Included:**

Supplemental Figures (Figure S1-S7)

Supplemental Figure Legends

Supplemental Experimental Section

Supplemental Tables (Table S1-S6)

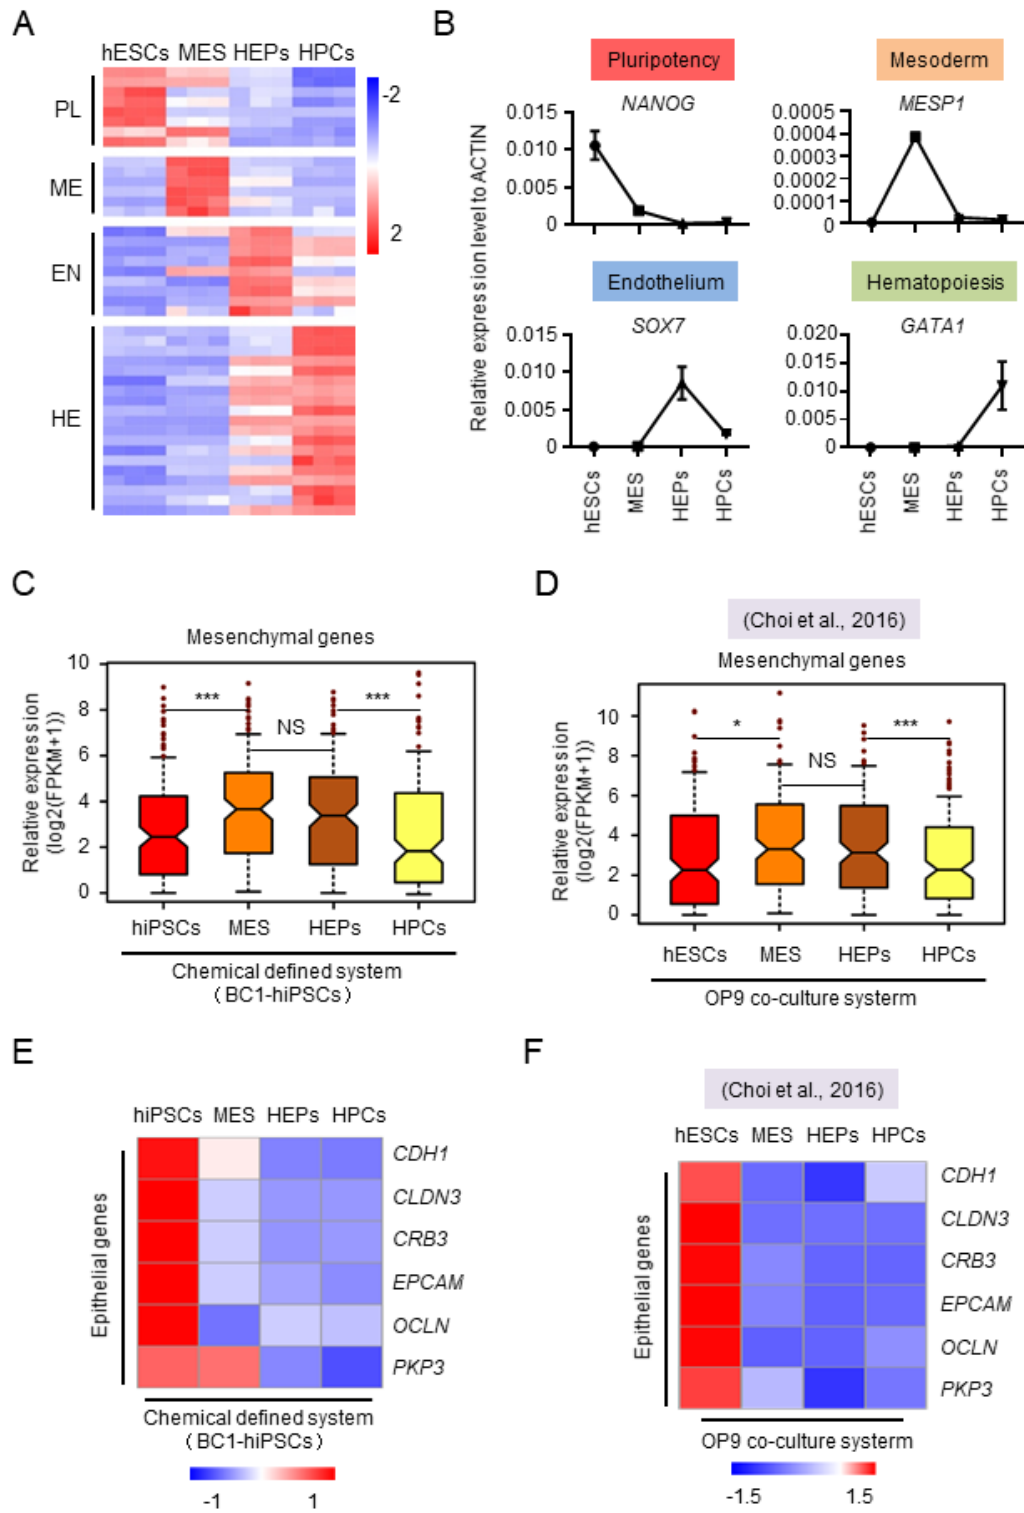

Fig. S1

**Figure. S1** Biphasic Regulation of Mesenchymal Genes during Hematopoietic Differentiation of hPSCs. Related to Figure 1

(A) The heatmap of characteristic genes for each population of cells during hematopoietic differentiation of hESCs. (B) The expression of representative genes in four different populations of cells during hematopoietic differentiation of hESCs, as detected with real-time PCR. (C) The box plot showing the different expression patterns of mesenchymal genes between the four populations of cells derived from BC1 hiPSCs during hematopoietic differentiation. (D) The box plot showing the different expression patterns of mesenchymal genes between the four populations of cells derived from hESCs during hematopoietic differentiation in the OP9 co-culture system. (E) The heatmap showing down-regulation of epithelial genes along hematopoietic differentiation of BC1. (F) The heatmap showing down-regulation of epithelial genes during hematopoietic differentiation in the OP9 co-culture system. NS, not significant, \* $P < 0.05$  and \*\*\* $P < 0.001$ .



**Figure. S2** Biphasic Regulation of Mesenchymal Genes Occurs during Hematopoietic Development *in vivo*. Related to Figure 2

(A) The heatmap showing the expression of characteristic genes for each population of cells during mouse embryonic hematopoiesis *in vivo*. (B) t-SNE showing the expression of representative genes for each population of cells during mouse embryonic hematopoiesis *in vivo*. (C) The gene sets associated with mesenchymal development were enriched in mesoderm and endothelium cells, as analyzed by GO enrichment analysis. (D) The dynamic expression of representative mesenchymal genes during mouse embryonic hematopoiesis *in vivo*. (E) PCA plot of endothelial cells (ECs) and hematopoietic stem and progenitor cells (HSPCs) during human hematopoietic development (CS12-CS15) *in vivo*. (F) Dot plots showing the scaled expression level of feature genes in the ECs and HSPCs during human hematopoietic development. (G) The box plot showing the expression of mesenchymal genes in ECs and HSPCs during human hematopoietic development. PL, pluripotency, ME, mesoderm, EN, endothelium, HE, hematopoiesis. Epi, Epiblast, Mes, Mesoderm, End, Endothelium, BP, Blood progenitors, EB, embryonic blood. \*\*\*P<0.001.

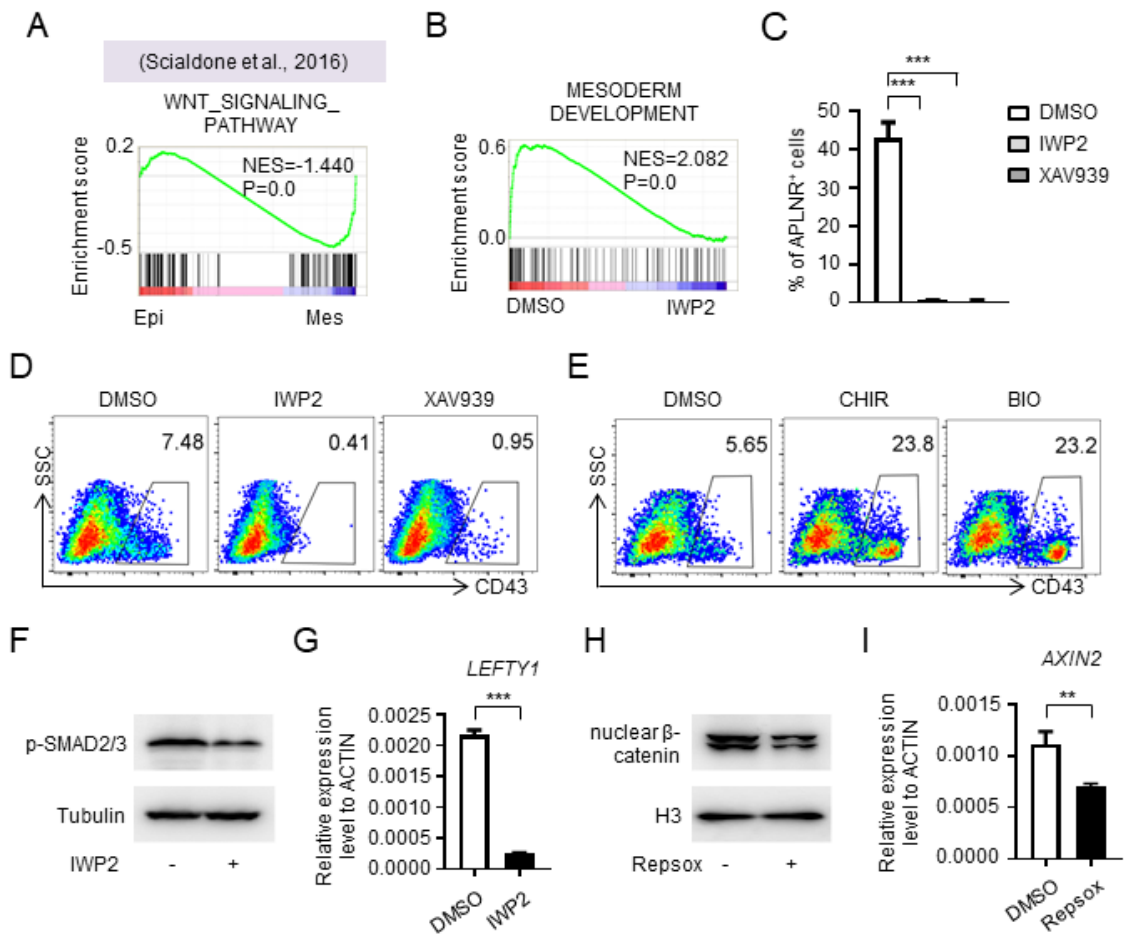

Fig. S3

**Figure. S3** Wnt Signaling is Essential for Mesenchymal Gene Expression and Induction of Differentiation. Related to Figure 3

(A) GSEA showing the enrichment of ‘Wnt signaling pathway’ gene set in mesoderm compared with epiblasts *in vivo*. (B) GSEA showing the enrichment of ‘Mesenchyme development’ gene set in DMSO-treated cells compared with IWP2-treated cells. (C) The percentage of APLNR<sup>+</sup> mesoderm cells with or without Wnt signaling inhibitor treatment at day 2 of hematopoietic differentiation. (D) Flow cytometry analysis of the percentage of CD43<sup>+</sup> HPCs with or without the treatments of Wnt signaling inhibitors. (E) Flow cytometry analysis of the percentage of CD43<sup>+</sup> HPCs with or without the treatments of Wnt signaling activators. (F) Western blotting of p-SMAD2/3 with or without IWP2 treatment during the stage of mesoderm induction. (G) Real-time PCR analysis of the expression of *LEFTY1* with or without IWP2 treatment during mesoderm induction. (H) Western blotting of nuclear β-catenin with or without Repsox treatment during mesoderm induction. (I) Real-time PCR analysis of the expression of *AXIN2* with or without Repsox treatment during mesoderm induction. \*\*P<0.01 and \*\*\*P<0.001.



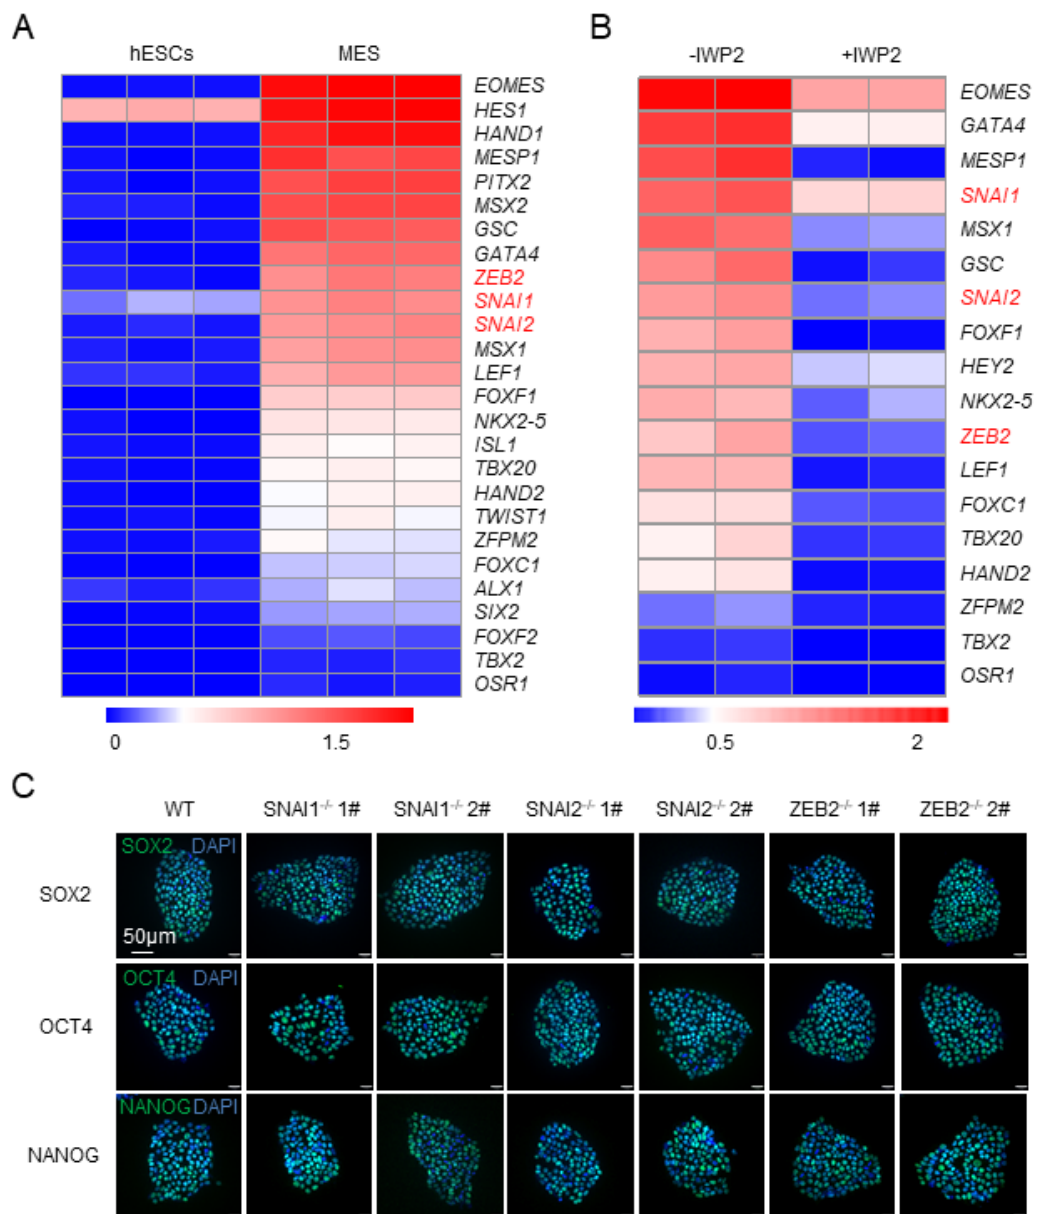

Fig. S4

**Figure. S4** Identification of Potential Cell Fate-Controlling Mesenchymal Genes. Related to Figure 4

(A) Heatmap showing the expression of 26 mesenchymal genes upregulated in mesoderm cells compared with hESCs. (B) Heatmap showing the expression of 18 mesenchymal genes down-regulated by IWP2 treatment. (C) The immunofluorescence of SOX2, OCT4 and NANOG in undifferentiated WT and *SNAI1*<sup>-/-</sup>, *SNAI2*<sup>-/-</sup>, *ZEB2*<sup>-/-</sup> hESCs.

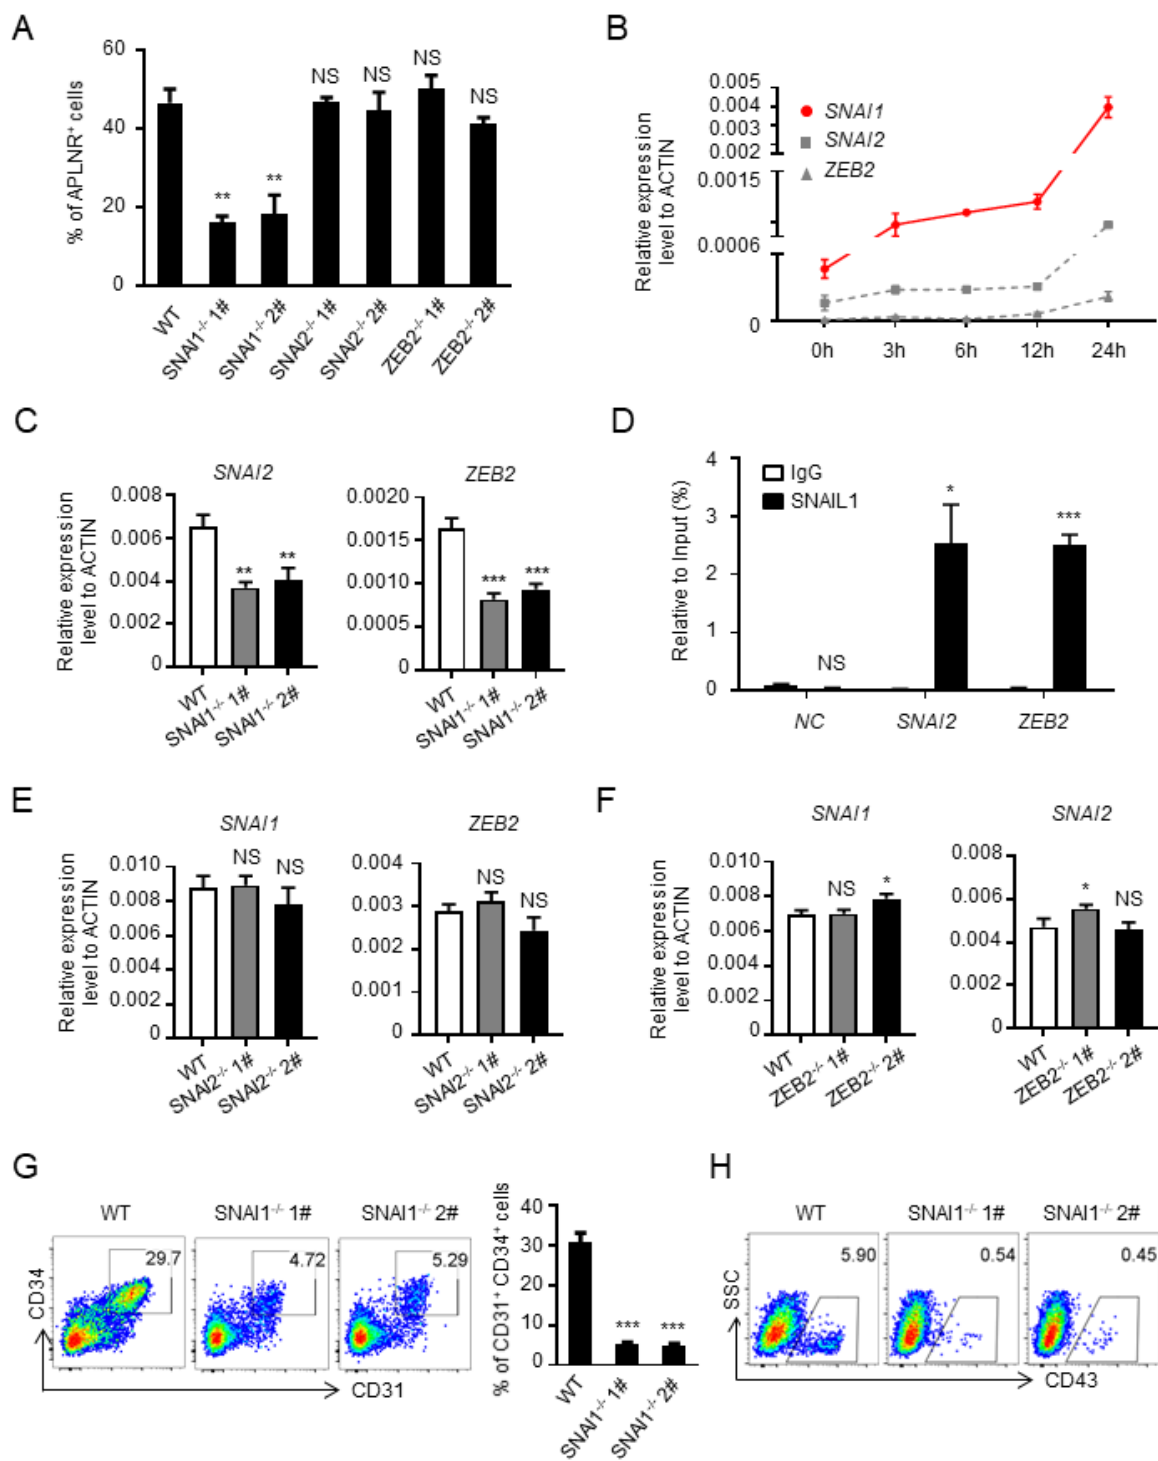

Fig. S5

**Figure. S5** SNAIL1 is Critical for Mesoderm Induction and HPC Generation. Related to Figure 5

(A) The percentage of APLNR<sup>+</sup> mesoderm cells derived from WT and SNAIL1<sup>-/-</sup>, SNAIL2<sup>-/-</sup>, ZEB2<sup>-/-</sup> hESCs at day 2 of hematopoietic differentiation. (B) Real-time PCR analysis of *SNAIL1*, *SNAIL2* and *ZEB2* expression from 0 h to 24 h after hematopoietic differentiation of hESCs. (C) Real-time PCR analysis of *SNAIL2* and *ZEB2* expression in cells derived from WT and SNAIL1<sup>-/-</sup> H1 cells at day 2 of hematopoietic differentiation; (D) ChIP-qPCR analysis of the occupancy of SNAIL1 at the promoter region of *SNAIL2* and *ZEB2*. (E) Real-time PCR analysis of the expression of *SNAIL1* and *ZEB2* in cells derived from WT and SNAIL2<sup>-/-</sup> H1 cells at day 2 of hematopoietic differentiation; (F) Real-time PCR analysis of the expression of *SNAIL1* and *SNAIL2* in cells derived from WT and ZEB2<sup>-/-</sup> H1 cells at day 2 of hematopoietic differentiation; (G) Flow cytometry analysis of the percentage of CD31<sup>+</sup>CD34<sup>+</sup> HEPs derived from WT and SNAIL1<sup>-/-</sup> hESCs. (H) Flow cytometry analysis of the percentage of CD43<sup>+</sup> HPCs derived from WT and SNAIL1<sup>-/-</sup> hESCs. NS, not significant, \*P<0.05, \*\*P<0.01 and \*\*\*P<0.001.

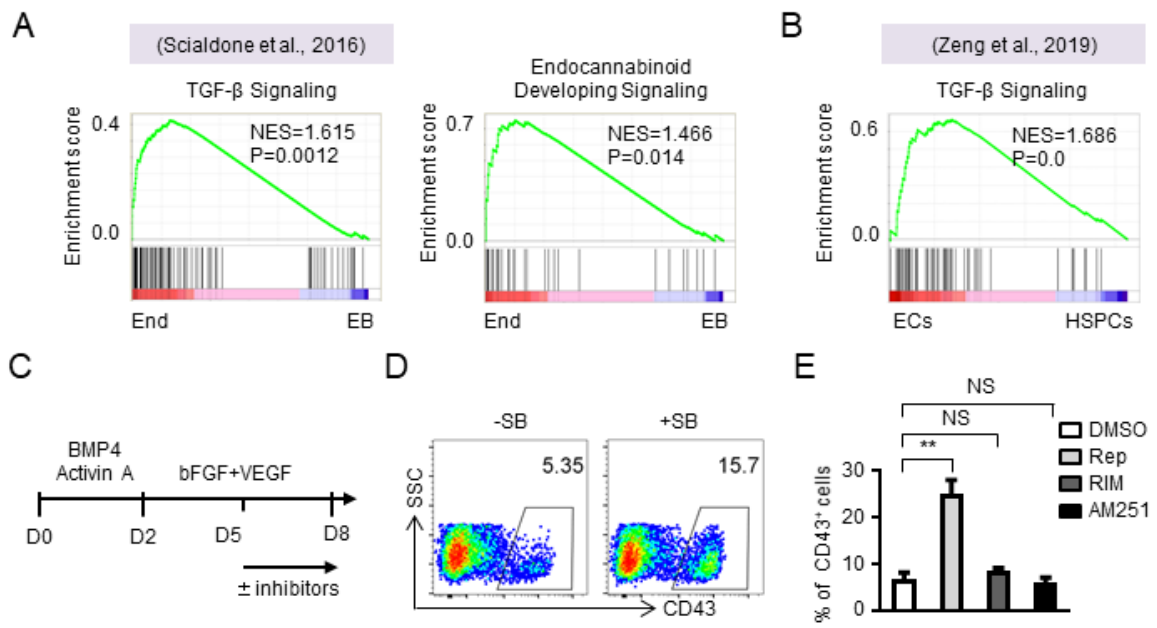

Fig.S6

**Figure. S6** The Suppressive Role of TGF- $\beta$  Signaling in Downregulation of Mesenchymal Genes and EHT. Related to Figure 6

(A) Comparison of 'TGF- $\beta$  signaling' and 'endocannabinoid developing signaling' gene sets between endothelium (End) and embryonic blood (EB) during mouse embryonic hematopoiesis *in vivo*. (B) Comparison of 'TGF- $\beta$  signaling'-associated gene expression between endothelial cells (ECs) and hematopoietic stem and progenitor cells (HSPCs) during human hematopoietic development. (C) The strategy of detecting the signaling inhibitors on the expression of mesenchymal genes and the production of hematopoietic cells. (D) Flow cytometry analysis of CD43<sup>+</sup> HPCs with or without SB431542 treatment. (E) The percentage of CD43<sup>+</sup> HPCs with or without the inhibitors of TGF- $\beta$  signaling and endocannabinoid developing signaling treatment. NS, not significant, \*\*P<0.01.

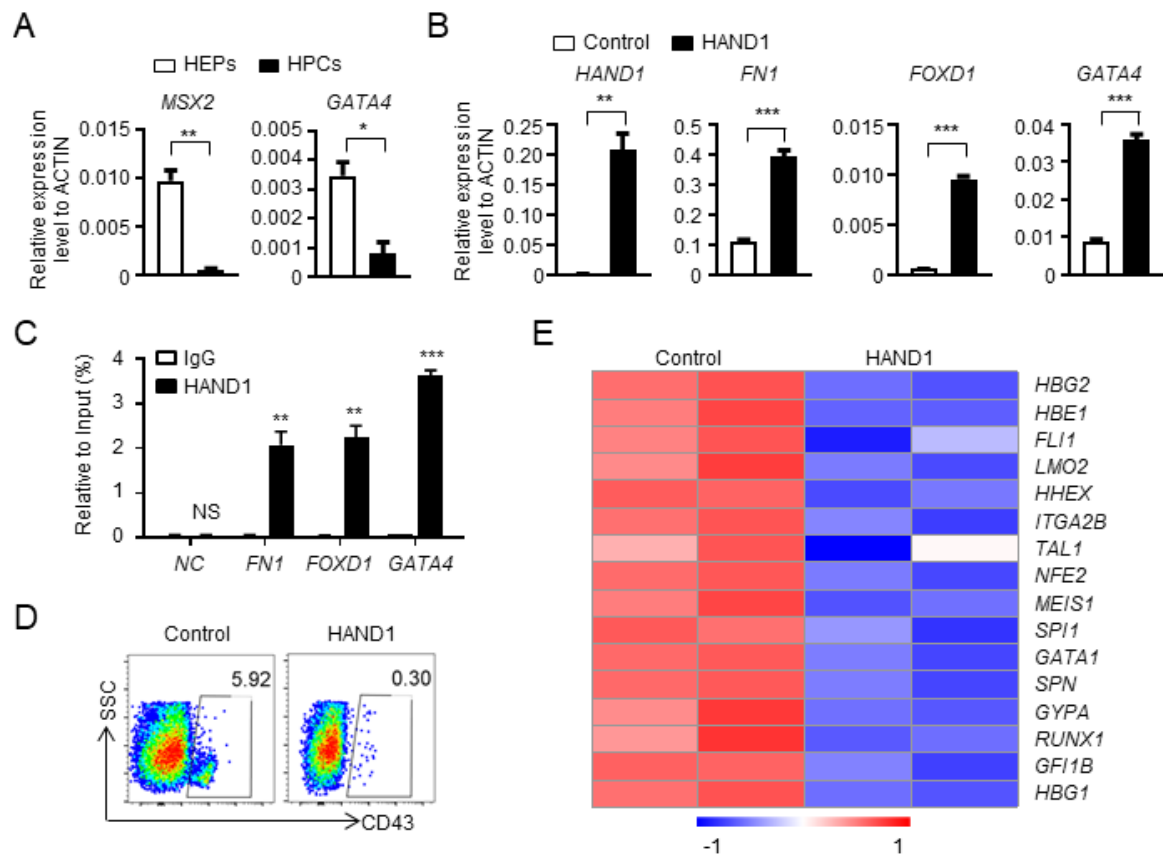

Fig. S7

**Figure. S7** HAND1 Mediates the Suppressive Function of TGF- $\beta$  Signaling in EHT. Related to Figure 7

(A) The relative mRNA expression of *MSX2* and *GATA4* between HEPs and HPCs during hematopoietic differentiation of hESCs. (B) The relative mRNA expression of *HAND1* and representative mesenchymal genes with or without HAND1 overexpression during the EHT process. (C) ChIP-qPCR analysis of the occupancy of HAND1 at the promoter region of *FNI*, *FOXD1* and *GATA4*. (D) Flow cytometry analysis of the percentage of CD43<sup>+</sup> HPCs with or without HAND1 overexpression. (E) The heatmap of hematopoiesis-associated genes with or without HAND1 overexpression. NS, not significant, \*P<0.05, \*\*P<0.01 and \*\*\*P<0.001.



## **Supplemental Experimental Section**

### **Flow Cytometry**

Accutase was used to dissociate differentiated cells into single cells. Then single cells were washed with PBS and centrifuged. After centrifugation, cells were resuspended with 100 ul 0.2% BSA to incubate with corresponding antibodies and isotype at 4°C for 25-30 min. Prior to flow cytometry analysis, cells were washed with PBS and resuspended with 300 ul PBS containing DAPI (1 ug). Canto II was used to perform flow cytometry analysis, and Flowjo V10 was used for analyzing results. Detailed information on antibodies is listed in Supplementary Table S2.

### **Cell Sorting and MACS**

For cell sorting, cells were dissociated using Accutase into single cells and washed with PBS to remove Accutase. Cells were then resuspended into 500 ul sterile 0.2% BSA supplemented with antibodies for 30 min at 4°C. After washes with PBS, cells were sorted using ARIA (BD, USA). Detailed information on antibodies is listed in Supplementary Table S2. For MACS, every  $1 \times 10^8$  cells were resuspended in 300 ul sorting buffer supplemented with 100 ul blocking buffer and 100 ul microbeads. After incubating at 4°C for 30 min, cells were washed with PBS to remove redundant microbeads. Then cells were loaded into the column which was placed in the magnetic field. After the passage of unlabeled cells through the column, the column was placed on a collection tube to collect the labeled cells.

### **Immunofluorescence**

Cells were washed with PBS for 3 times to remove redundant medium and fixed with 4% PFA at room temperature for 20 min. After fixation, cells were washed with PBS 3 times and permeabilized with 0.2% Triton X-100 at room temperature for 20 min. Next, cells were washed using PBS for 3 times and blocked by 0.5% BSA for 1 hour. Finally, cells were incubated with antibodies at 4°C overnight. After being stained with DAPI, images were collected by the use of Leica SP2 microscope. Detailed information on antibodies is listed in Supplementary Table S3.

### **Generation of Knockout hESC Lines Using CRISPR/Cas9**

The small-guide RNAs targeting SNAI1 and HAND1 gene were designed utilizing the CRISPR Design Tool (<http://tools.genome-engineering.org>). The corresponding oligonucleotides were cloned into the CRISPR-Cas9-Lenti-V2 vector. To establish gene knockout hESC lines, lentivirus carrying sgRNA was infected into H1 cell line. After 2 weeks of selection with puromycin (1 µg/ml), cells were dissociated using Accutase into single cells, and then single-cell clones were selected and expanded for gene sequencing to identify gene knockout hESC lines. Detailed information of sgRNAs and genotyping primers are listed in Supplementary Table S4.

### **Establishing SNAI1 or HAND1-overexpressing hESC Lines**

The coding region of SNAI1 or HAND1 carrying the FLAG tag was synthesized by Youbio Company (<http://www.youbio.cn/>). The nucleotide fragments were cloned into SpeI and BmtI double-digested pBASE vector for further experiments. To establish SNAI1 or HAND1 overexpressing hESC lines, lentivirus carrying the constructed vector was infected into the

H1 cell line. Then cells were subsequently selected with puromycin (1  $\mu\text{g/ml}$ ) and determined with flow cytometry and real-time PCR.

### **qRT-PCR**

qRT-PCR was performed as previously described.<sup>[1]</sup> The detailed primer sequences are shown in Supplemental Table S5.

### **Western blotting**

Western blotting was performed as previously described.<sup>[1]</sup> The detailed information of antibodies used is shown in Supplemental Table S3.

### **ChIP-qPCR**

The cells derived from SNAI1 or HAND1-Overexpressing H1 hESCs were collected for ChIP-qPCR assay. ChIP assay was carried out using the Magna ChIP<sup>TM</sup> A/G kit (Millipore) following the manufacturer's suggestions. The detailed information of antibodies used is shown in Supplemental Table S3. And the primers used in ChIP-qPCR were listed in Supplementary Table S6.

## Supplementary Table S1.

### Signaling Pathway Small Molecules Used in This Study.

| Reagent    | Cat. NO. | Finally Concentration | Source  |
|------------|----------|-----------------------|---------|
| IWP2       | S7085    | 3uM                   | SELLECK |
| XAV939     | S1180    | 5uM                   | SELLECK |
| CHIR99021  | S1263    | 3uM                   | SELLECK |
| BIO        | S7198    | 2uM                   | SELLECK |
| SB431542   | S1067    | 20uM                  | SELLECK |
| Repsox     | S7223    | 1uM                   | SELLECK |
| Rimonabant | S3021    | 2.5uM                 | SELLECK |
| AM251      | S2819    | 1uM                   | SELLECK |

**Supplementary Table S2.**

**Flow Cytometry Antibodies Used in This Study.**

---

| Antigen | Fluorochrome conjugated | Source        | Cat#       |
|---------|-------------------------|---------------|------------|
| APLNR   | APC                     | R&D systems   | FAB856A    |
| CD31    | PE                      | BD bioscience | 555446     |
| CD31    | APC                     | eBioscience   | 17-0319-42 |
| CD31    | FITC                    | BD bioscience | 555445     |
| CD34    | APC                     | BD bioscience | 555824     |
| CD34    | PE                      | BD bioscience | 555822     |
| CD43    | PE                      | BD bioscience | 560199     |
| CD43    | APC                     | BD bioscience | 560198     |
| CD43    | PerCP-eFluor 710        | eBioscience   | 46-0438-42 |
| CD45    | PE                      | BD bioscience | 560975     |

---

**Supplementary Table S3.****The Sources and Dilutions of the Antibodies Used in This Study.****(I: Immunofluorescence; W: Western Blotting; C: ChIP)**

---

| Antibody         | Source         | Cat#     | Dilution      |
|------------------|----------------|----------|---------------|
| OCT3/4           | Santa Cruz     | SC-9081  | 1:500(I)      |
| SOX2             | Millipore      | AB5603   | 1:200(I)      |
| NANOG            | Cell Signaling | #3580    | 1:200(I)      |
| CD43             | Santa Cruz     | sc-51727 | 1:200(I)      |
| DAPI             | Solarbio       | C0060    | 1:1000(I)     |
| p-SMAD2/3        | CST            | 8828S    | 1:500(W)      |
| $\beta$ -Catenin | CST            | 9562S    | 1:1000(W)     |
| Alpha-tubulin    | Abcam          | Ab11304  | 1:2000(W)     |
| Histone H3       | CST            | 2650S    | 1:1000(W)     |
| Flag             | Sigma          | F1804    | 2 $\mu$ g (C) |

---

#### Supplementary Table S4.

#### The Primer Sequences Used for sgRNA Synthesis and the Amplification of Target Sequence Fragments (TSF)

---

| Primer       | Sequence 5'-3'         |
|--------------|------------------------|
| SNAI1 E1g2 F | GTTAGGCTTCCGATTGGGGT   |
| SNAI1 E1g2 R | ACCCAATCGGAAGCCTAAC    |
| SNAI2 E1g1 F | GCGGTAGTCCACACAGTGAT   |
| SNAI2 E1g1 R | ATCACTGTGTGGACTACCGC   |
| ZEB2 E1g1 F  | GTTTGCGCCTCTTGCACCGG   |
| ZEBI2 E1g1 R | CCGGTGCAAGAGGGCGCAAAC  |
| SNAI1 TSF F  | GAGTACTTAAGGGAGTTGGCGG |
| SNAI1 TSF R  | GTATTGAGAATCGGCCCCAC   |
| SNAI2 TSF F  | GTA ACTCCGTAGGTGCCAG   |
| SNAI2 TSF R  | GCTACTTCCTGACTACTC     |
| ZEB2 TSF F   | CTCGCGGGTGCAACACACC    |
| ZEBI2 TSF R  | GGGTGCCTGACGCTCAC      |

---

**Supplementary Table S5.**

**qRT-PCR (quantitative real time polymerase chain reaction) Primers Used in This Study.**

| Primer   | Sequence 5'-3'         |
|----------|------------------------|
| hACTIN-F | CTCTTCCAGCCTTCCTTCCT   |
| hACTIN-R | AGCACTGTGTGTTGGCGTACAG |
| hBMP2-F  | CGTGACCAGACTTTTGGACAC  |
| hBMP2-R  | GGCATGATTAGTGGAGTTCAG  |
| hCDH1-F  | TGCCCAGAAAATGAAAAAGG   |
| hCDH1-R  | GTGTATGTGGCAATGCGTTC   |
| hEPCAM-F | GCGTTCGGGCTTCTGCTTGC   |
| hEPCAM-R | CCGCTCTCATCGCAGTCAGGA  |
| hFN1-F   | TGACCCCTACACAGTTTCCCA  |
| hFN1-R   | TGATTCAGACATTCGTTCCCAC |
| hFOXD1-F | ATGACCCTGAGCACTGAGAT   |
| hFOXD1-R | CCTCTTCCTCGTCTTCTT     |



|          |                        |
|----------|------------------------|
| hGATA1-F | GACAGGACAGGCCACTACCT   |
| hGATA1-R | CTGCCCCTTTACTGACAATC   |
| hGATA4-F | CGACACCCCAATCTCGATATG  |
| hGATA4-R | GTTGCACAGATAGTGACCCGT  |
| hHAND1-F | CACCAAGCTCTCCAAGATCA   |
| hHAND1-R | GCGCCCTTTAATCCTCTTCT   |
| hMSX2-F  | TTACCACATCCCAGCTCCTC   |
| hMSX2-R  | CCTGGGTCTCTGTGAGGTTC   |
| hNANOG-F | TTTGTGGGCCTGAAGAAAACCT |
| hNANOG-R | AGGGCTGTCCTGAATAAGCAG  |
| hSNAI1-F | AATCGGAAGCCTAACTACAGCG |
| hSNAI1-R | GTCCCAGATGAGCATTGGCA   |
| hSNAI2-F | CGAACTGGACACACATACAGTG |
| hSNAI2-R | CTGAGGATCTCTGGTTGTGGT  |
| hNRP1-F  | ACGATAAATGTGGCGATACT   |
| hNRP1-R  | CCAACAGCCTTGAATGCACT   |

|           |                          |
|-----------|--------------------------|
| hOCLN-F   | ATTGCCATCTTTGCCTGTGTGG   |
| hOCLN-R   | GCCATAGCCATAGCCACTTCCG   |
| hPOU5F1-F | CTTGAATCCCGAATGGAAAGGG   |
| hPOU5F1-R | GTGTATATCCCAGGGTGATCCTC  |
| hSOX2-F   | GCCGAGTGGAAACTTTTGTCG    |
| hSOX2-R   | GGCAGCGTGTACTTATCCTTCT   |
| hSOX7-F1  | CCTCTCCTTCTTGTGCCTTG     |
| hSOX7-R1  | GGGAGGAAAGCTGGTGTG       |
| hMESP1-F  | AGCCCAAGTGACAAGGGACAAC   |
| hMESP1-R  | AAGGAACCACTTCGAAGGTGCTGA |
| hTBX20-F  | CAAGCCCCAACTCTCCTCTC     |
| hTBX20-R  | CTCCACCAAACCTCCCATGA     |
| hZEB2-F   | GCCGAGTGGAAACTTTTGTCG    |
| hZEB2-R   | GGCAGCGTGTACTTATCCTTCT   |
| hAXIN2-F  | CTGGTGCAAAGACATAGCCA     |
| hAXIN2-R  | AGTGTGAGGTCCACGGAAAC     |

hLEFTY-F

CAGCTGGAGCTGCACACCCT

hLEFTY-R

TCCTGGTACCCTCGAACA

---

**Supplementary Table S6.**

**ChIP-qPCR (chromatin immunoprecipitation-quantitative polymerase chain reaction)**

**Primers Used in This Study.**

---

| Primer        | Sequence 5'-3'        |
|---------------|-----------------------|
| SNAI1 NC-F    | GCTTCTCAGTACGGACTCGC  |
| SNAI1 NC-R    | GCCTGGGCTCTTGCCTTCA   |
| SNAI1 SNAI2-F | CTCTGACAAGTCTTGACAT   |
| SNAI1 SNAI2-R | GAATAAGGAAAGAACAAT    |
| SNAI1 ZEB2-F  | TCCAGTCCAGAAATTCATC   |
| SNAI1 ZEB2-R  | TTAGGTACCAGAGCCAGA    |
| SNAI1 NRP1-F  | GGAGAAGACAGGCTTGACCCG |
| SNAI1 NRP1-R  | CTGGGAGCAGTGACGTGCG   |
| SNAI1 TBX20-F | CCACTCAATACAAAGAAATG  |
| SNAI1 TBX20-R | TTTGGTTATTAAAGTCCCC   |
| SNAI1 BMP2-F  | GTAGTCAGGCTTCCTCCAA   |
| SNAI1 BMP2-R  | GGATTAGCAACCCACAGAG   |

---

|               |                     |
|---------------|---------------------|
| HAND1 NC-F    | TACTACCGCTGTCAATCAC |
| HAND1 NC-R    | ATAGCCTTTATGGGTCACT |
| HAND1 FN1-F   | CGGAACTCCCGGTACTTAG |
| HAND1 FN1-R   | CTCCCTGTTCGGACTTCTT |
| HAND1 FOXD1-F | AGAATGGGTAAAGGGTCAA |
| HAND1 FOXD1-R | CCTCCAGATCGGGCGAGCG |
| HAND1 GATA4-F | AGTTCTGTTCCCACCATAT |
| HAND1 GATA4-R | AGTGAGATCCCATCTCAAA |

---

## Supplemental References

[1] H. Wang, C. Liu, X. Liu, M. Wang, D. Wu, J. Gao, P. Su, T. Nakahata, W. Zhou, Y. Xu, L. Shi, F. Ma, J. Zhou, *Stem Cell Reports*, **2018**, *10*, 447-460.
